# Supplementary material for: The First Analysis of Synaptonemal Complexes in Jawless Vertebrates: Chromosome Synapsis and Transcription Reacti-vation at Meiotic Prophase I in the Lamprey Lampetra Fluviati-lis (Petromyzontiformes, Cyclostomata)
Source: Preprints.org preprint supplement (doi:10.20944/preprints202212.0504.v1), 2022-12-27
Supplement: Supplementary file 1 [file supplementary]

## Supplementary material

# The First Analysis of Synaptonemal Complexes in Jawless Vertebrates: Chromosome Synapsis and Transcription Reactivation at Meiotic Prophase I in the Lamprey *Lampetra fluviatilis* (Petromyzontiformes, Cyclostomata)

Sergey Matveevsky <sup>1,\*</sup>, Nikolay Tropin <sup>2</sup>, Aleksandr Kucheryavyy <sup>3</sup> and Oxana Kolomiets <sup>1</sup>

<sup>1</sup> Vavilov Institute of General Genetics, Russian Academy of Sciences, Moscow, Russia; [sergey8585@mail.ru](mailto:sergey8585@mail.ru) (SM), [olkolomiets@mail.ru](mailto:olkolomiets@mail.ru) (OK)

<sup>2</sup> Vologda branch of the Russian Federal Research Institute of Fisheries and oceanography, Vologda, Russia; [nikolay-tropin1@yandex.ru](mailto:nikolay-tropin1@yandex.ru) (NT)

<sup>3</sup> Institute of Ecology and Evolution, Russian Academy of Sciences, Moscow, Russia; [kucheryavyy@sevin.ru](mailto:kucheryavyy@sevin.ru) (AK)

\* Correspondence: [s.matveevsky@vigg.ru](mailto:s.matveevsky@vigg.ru) (SM)

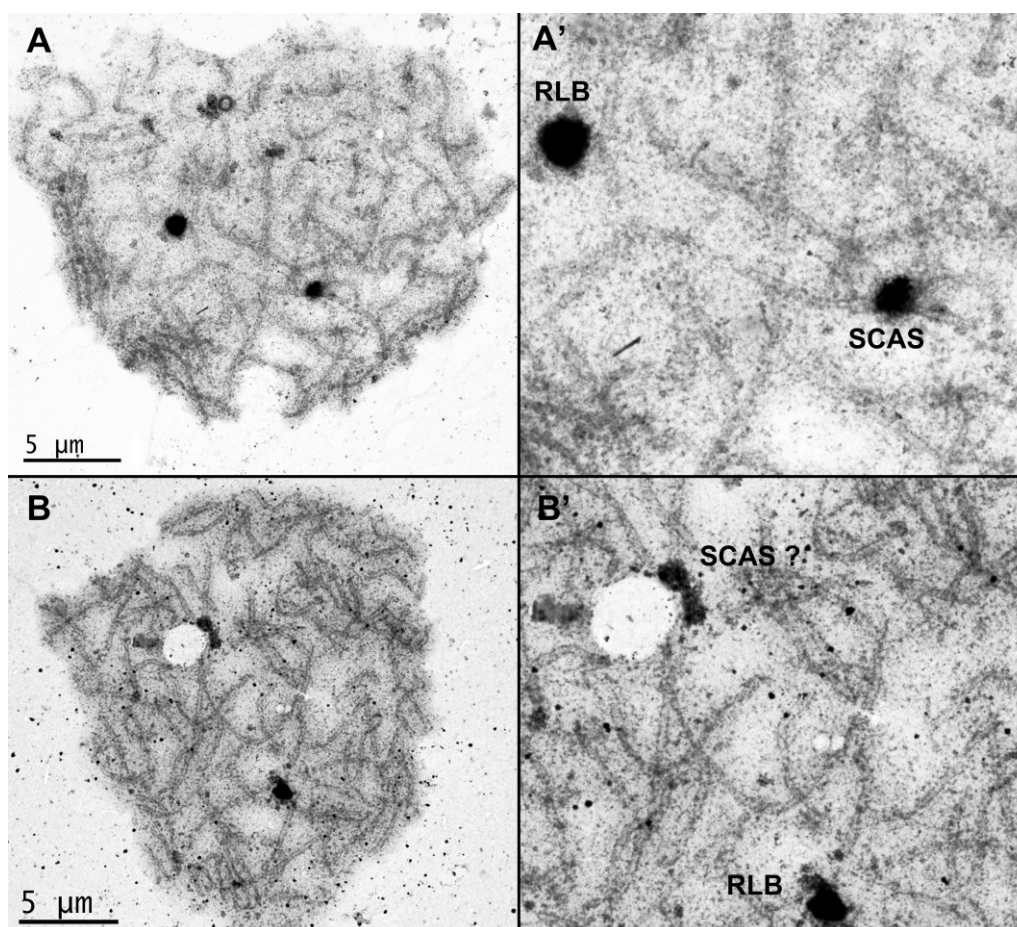

**Figure S1.** Electron microscopic microphotographs of lamprey spermatocytes at the pachytene stage.

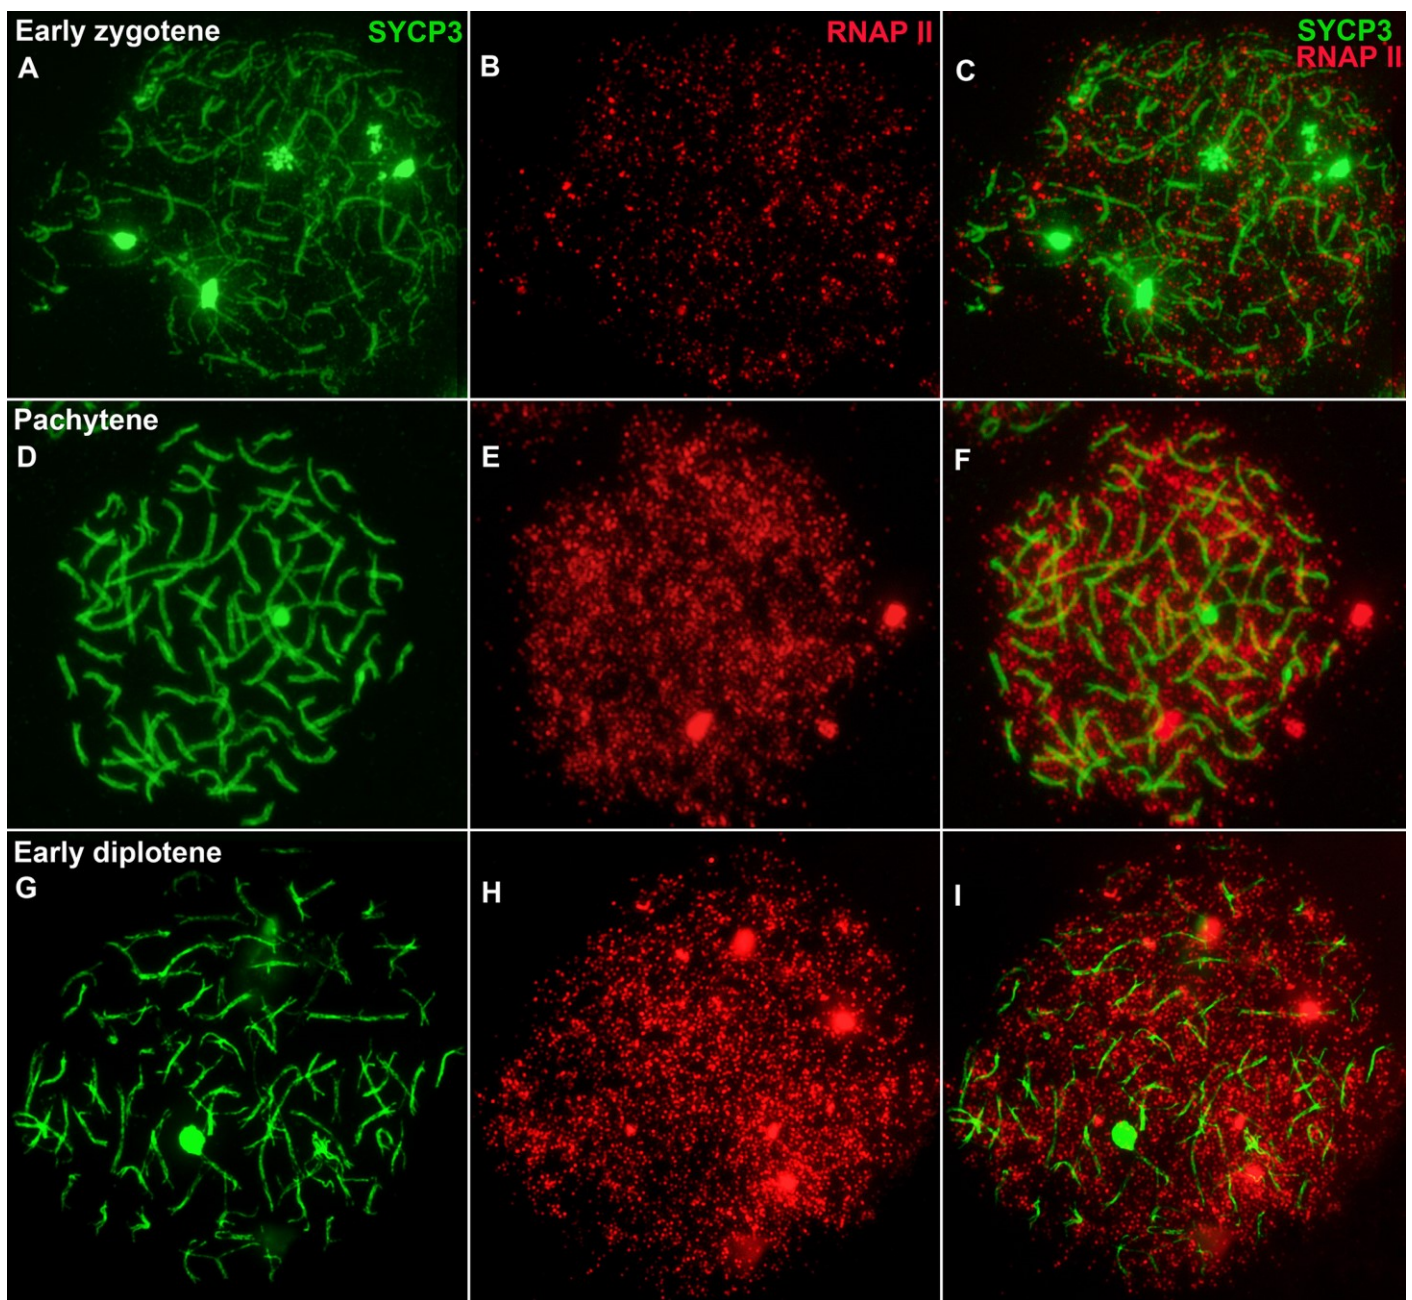

**Figure S2.** Immunolocalization of SYCP3 (green) and RNA polymerase (RNAPII, red) proteins in lamprey spermatocytes at the prophase I. **A-C.** Early zygotene (see Fig. 1C, C'); **D-F.** Pachytene; **G-I.** Early diplotene (see Fig. 1G, G').



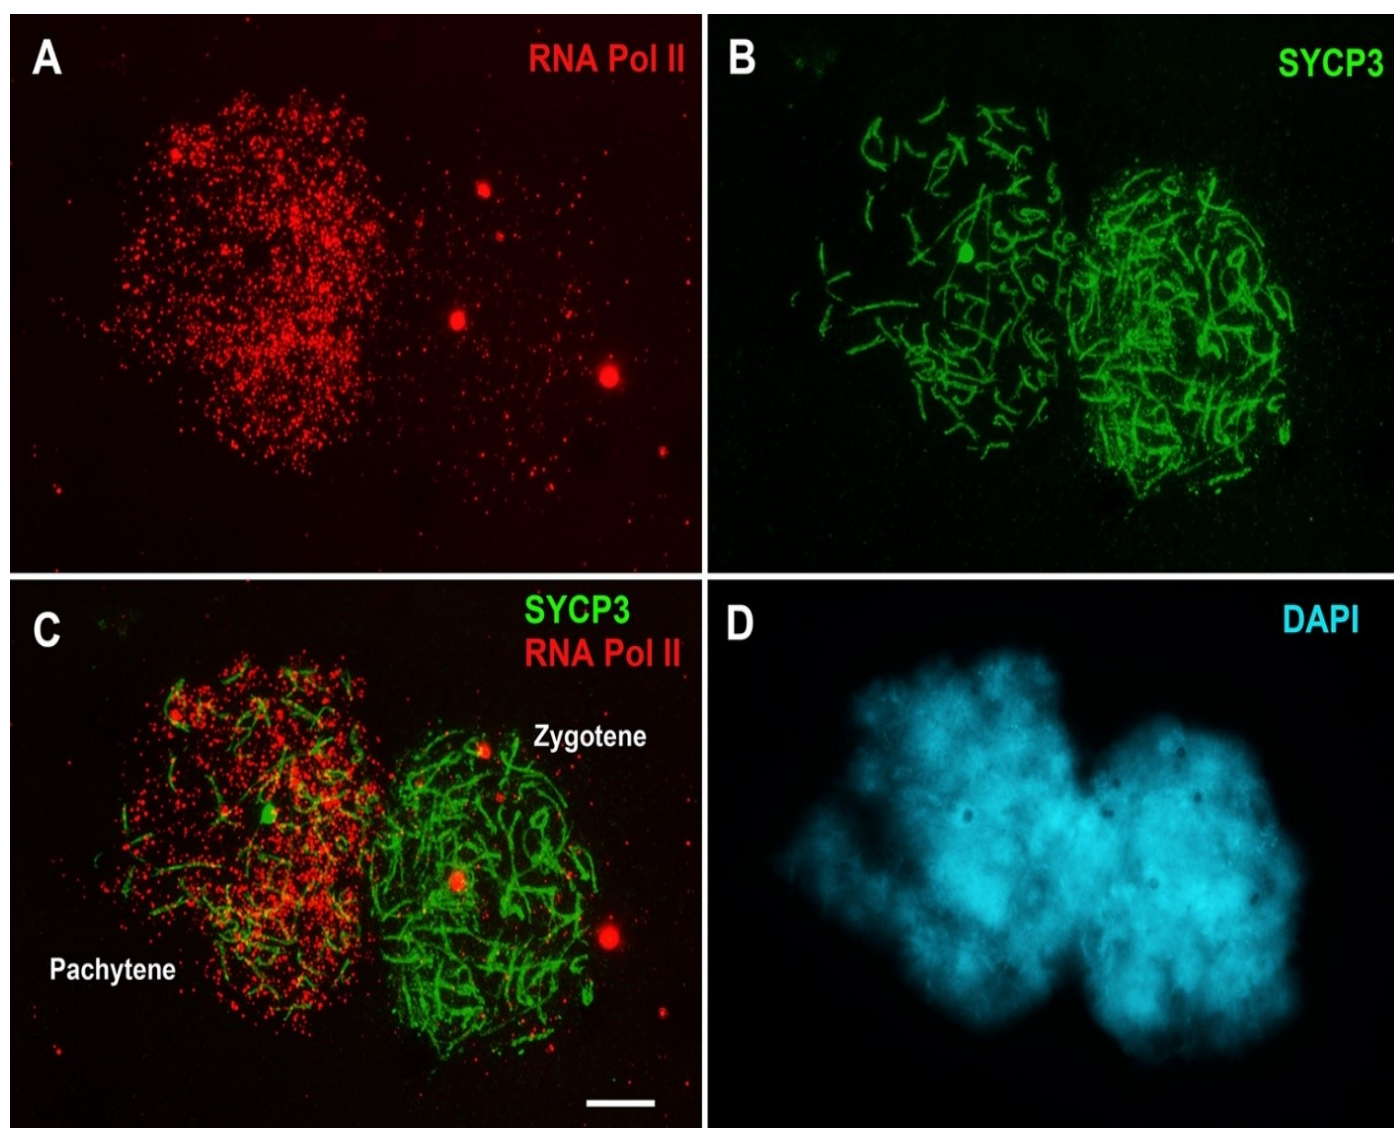

**Figure S3.** Immunocalization of SYCP3 (green) and RNA polymerase (RNA Pol II, red) proteins in lamprey spermatocytes at the zygotene and pachytene stages. Scale bars = 5  $\mu$ m

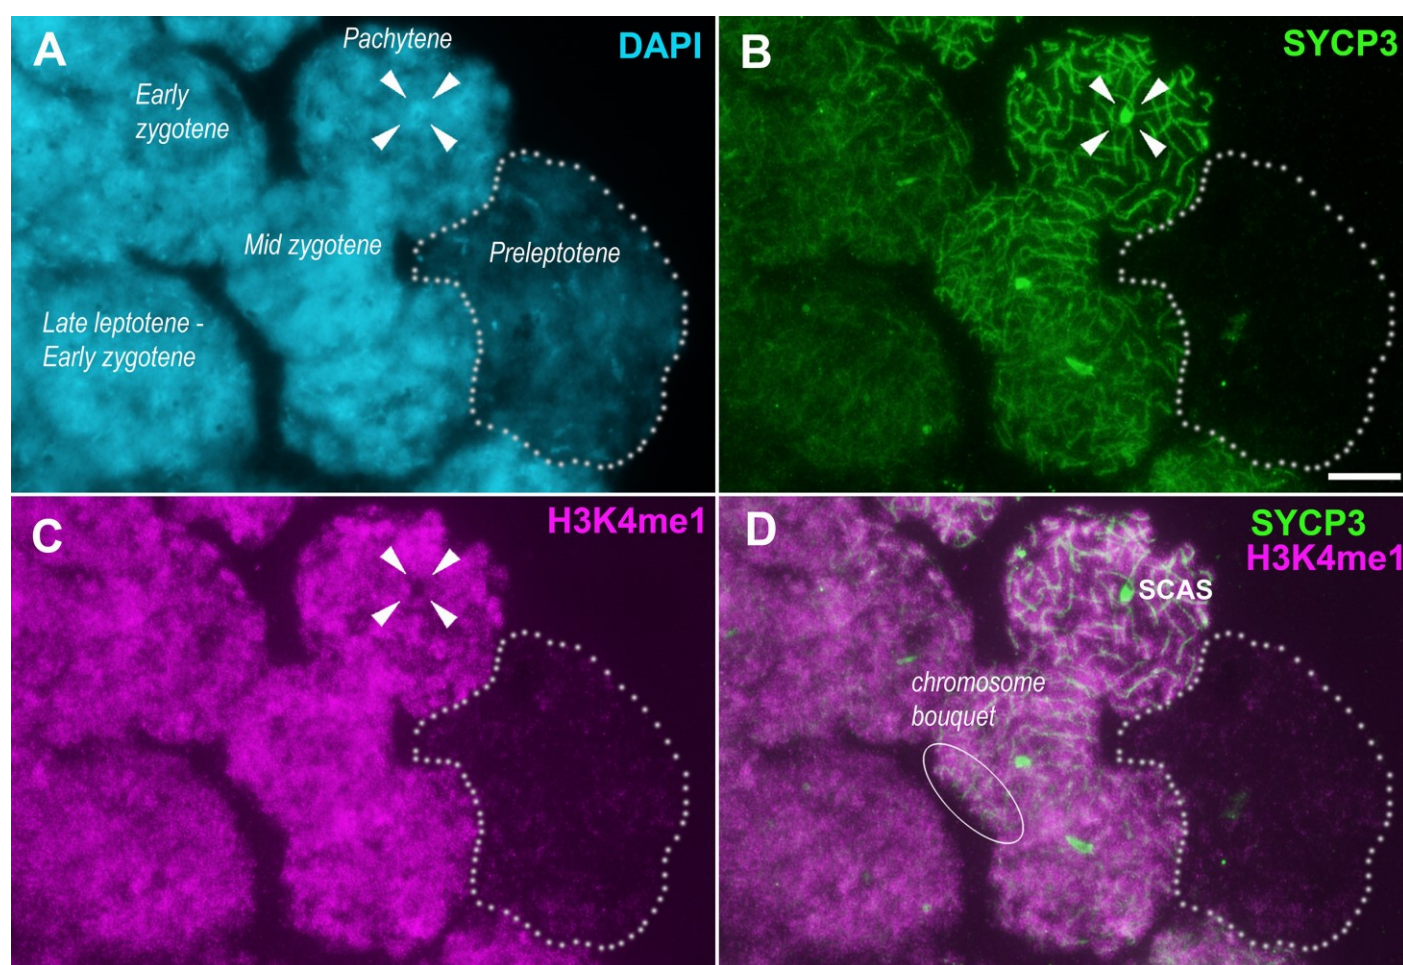

**Figure S4.** Immunolocalization of SYCP3 (green) and H3K4me1 (magenta) proteins in lamprey spermatocytes at different stages of prophase I. Scale bars = 5  $\mu\text{m}$



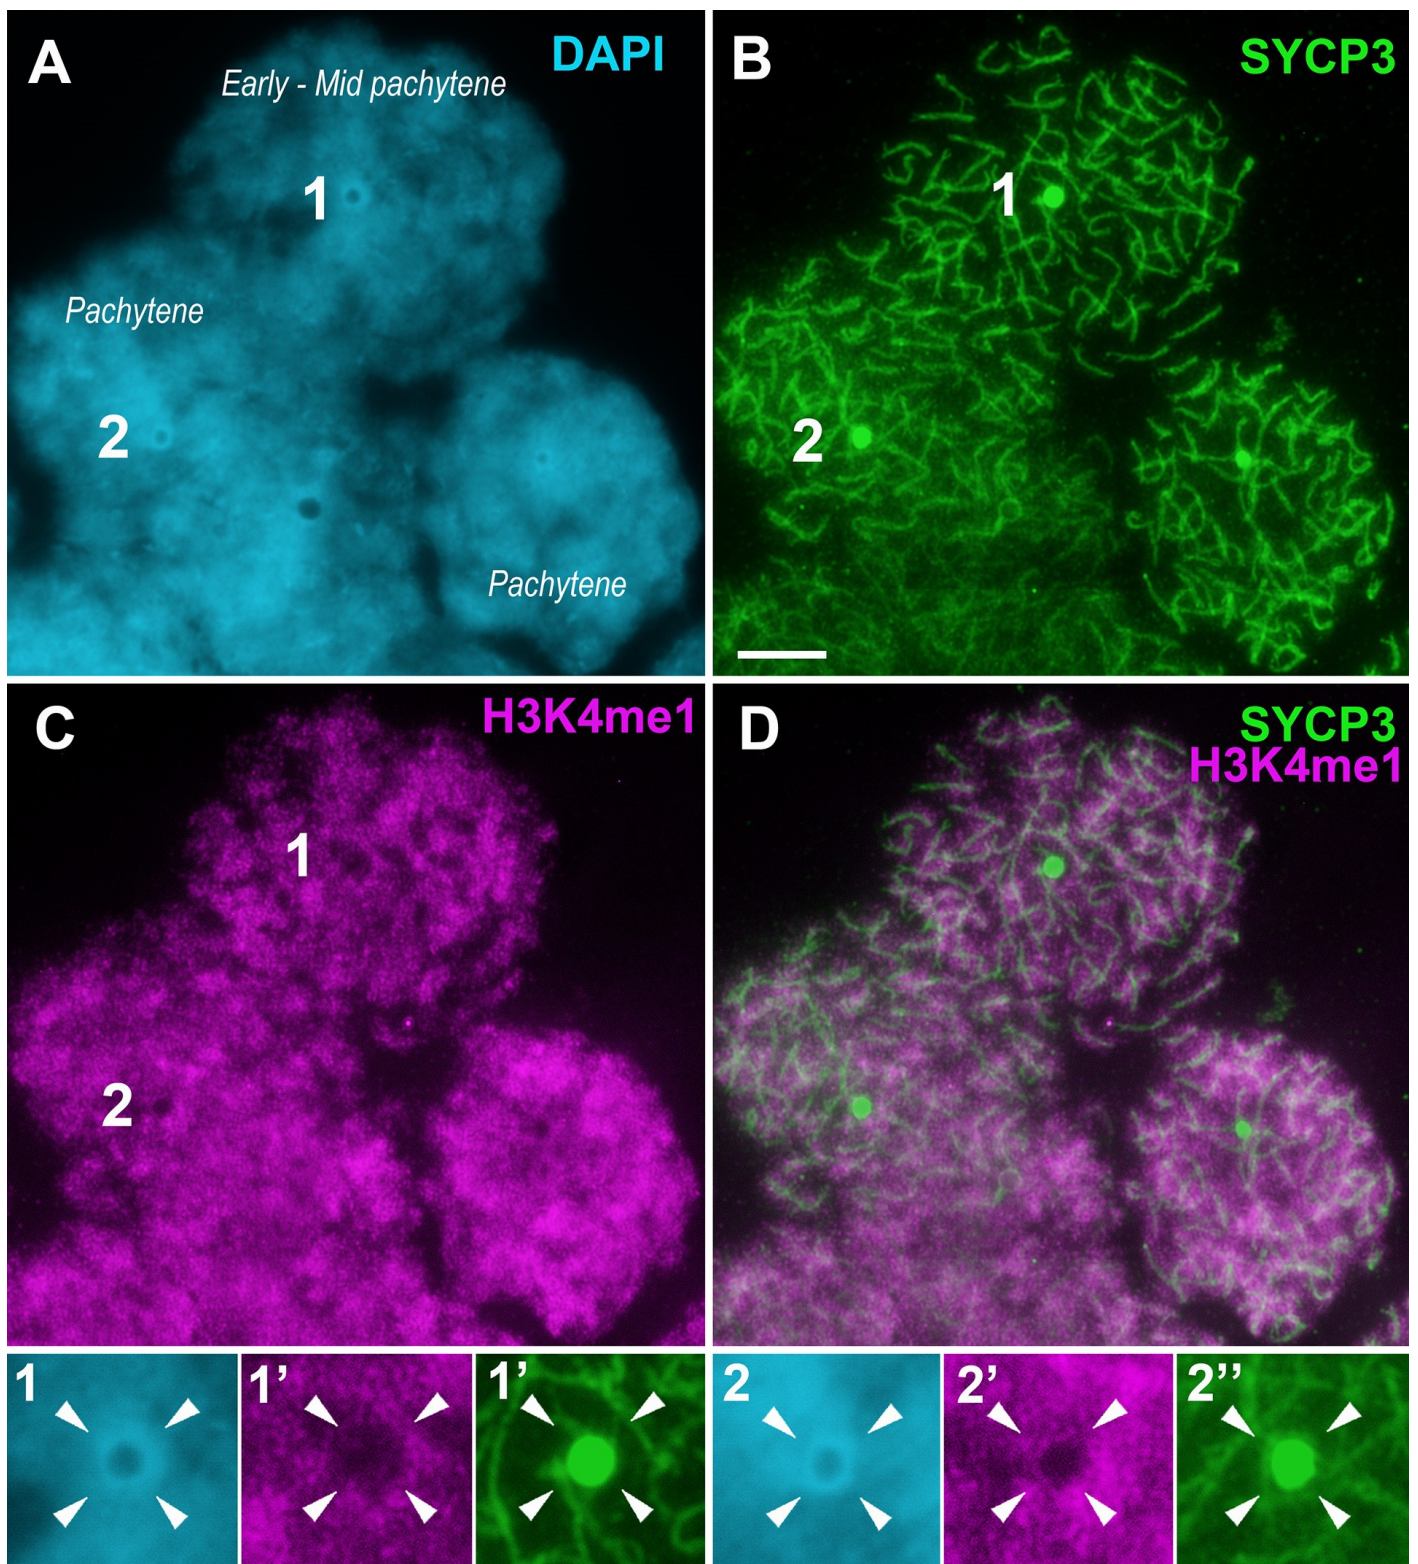

**Figure S5.** Immunolocalization of SYCP3 (green) and H3K4me1 (magenta) proteins in lamprey spermatocytes at different stages of prophase I. Scale bars = 5  $\mu$ m



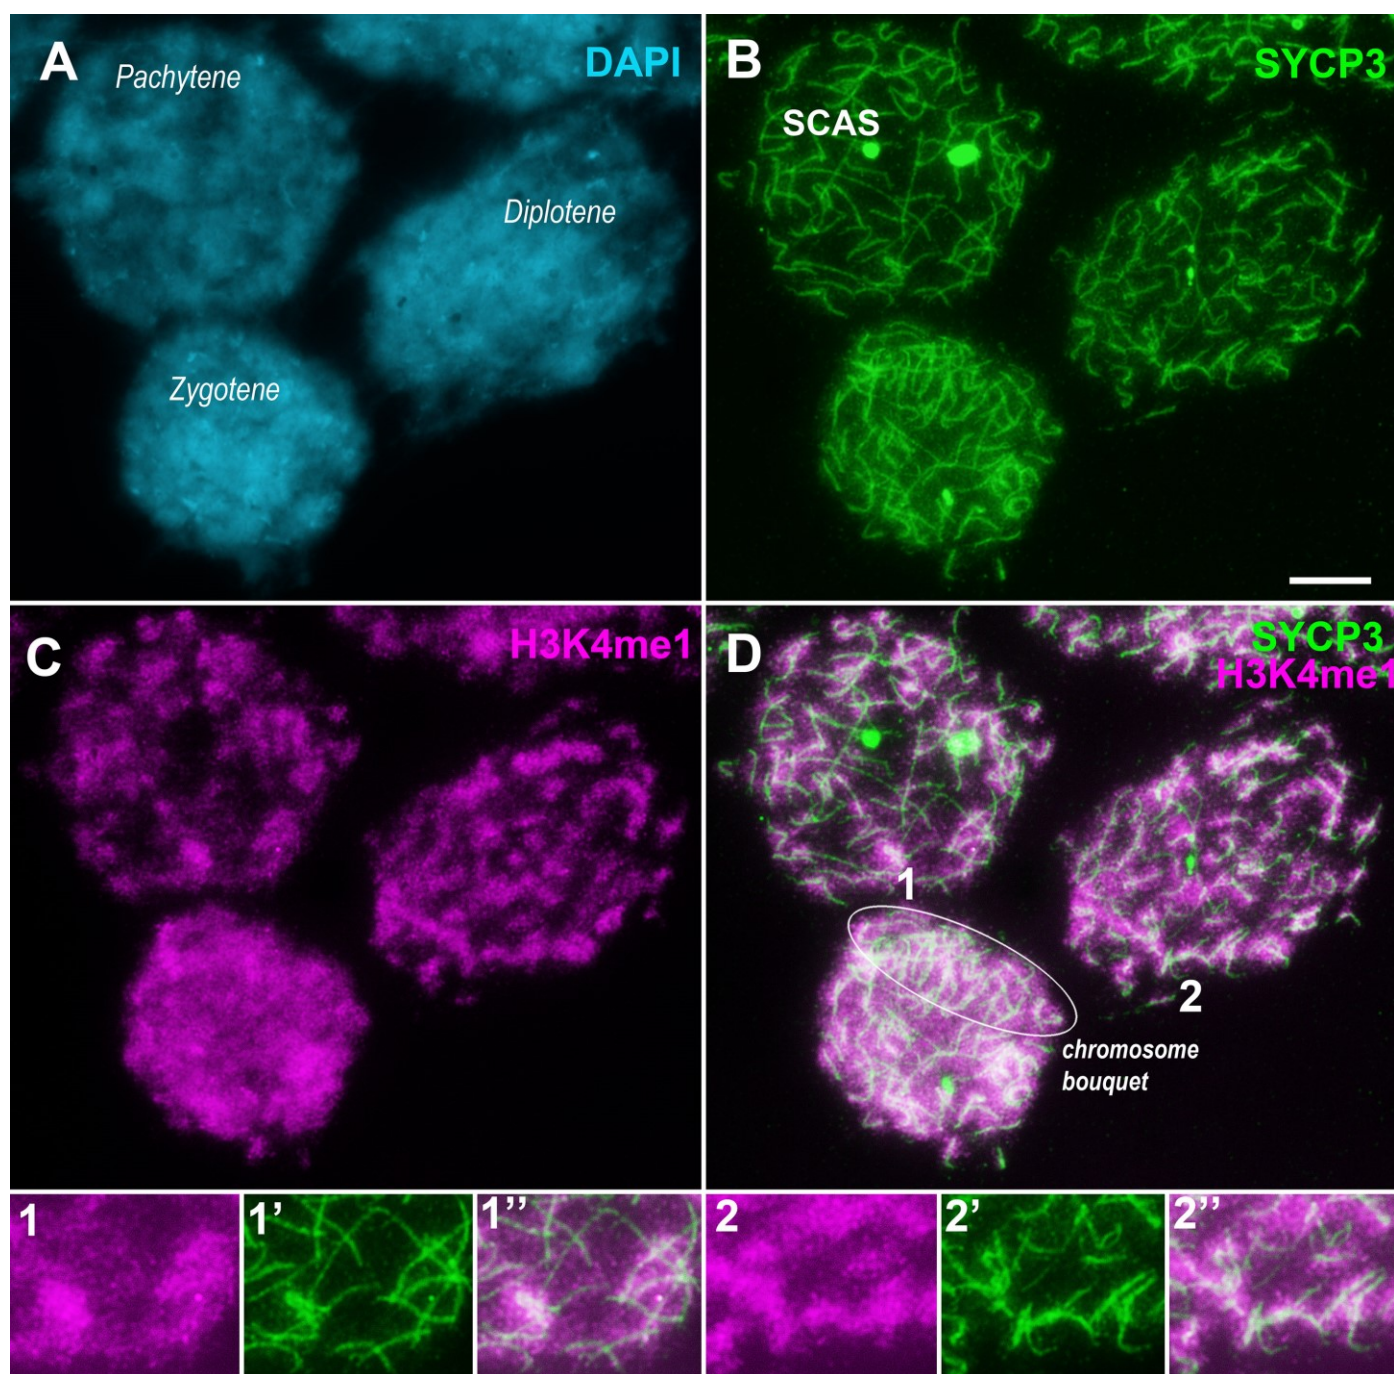

**Figure S6.** Immunolocalization of SYCP3 (green) and H3K4me1 (magenta) proteins in lamprey spermatocytes at different stages of prophase I. Scale bars = 5  $\mu$ m
